# Supplementary material
Source: Springer Nature journal article supplement (https://www.springermedizin.de/resource/supplementary/13584_2013_104_MOESM1_ESM.pdf/9676986)
Supplement: MOESM1 [file 9676986]

1. The need for organs in Israel

2. The willingness to donate organs after death

3. Did you sign a donor card?

4. Support for preferred status for donor card holders

5. Does preferred status increase willingness to donate

6. Opinion re Directed Donation

- a. "a new law is being proposed that allows individuals who sign a donor card to direct their post mortem organs to other individuals who have also signed a donor card. Only if no match is found in the group of donor card signers, these organs will be offered to others. Do you find this proposal fair and/or just?"

7. Does DD increase willingness to donate

8. Specific scenarios of DD:

- a. to a family member
- b. to others who have signed donor cards
- c. other categories

9. Is altruism in organ donation important?

10. Do preferred status or Directed donation harm the altruism principle

11. The willingness to be a recipient
